# Supplementary material for: Dietary iron loading negatively affects liver mitochondrial function
Source: Royal Society of Chemistry journal article supplement (doi:10.1039/c7mt00177k), 2017-01-01

## Supplementary Information

**Fig. S1** Determination of mitochondrial respiratory capacity in liver homogenates. **(A)** Oxygraph-2k. Mitochondrial respiratory capacity was performed by high-resolution respirometry (OROBOROS, Austria). **(B)** O2k representative traces. The blue line represents oxygen concentration [ $\mu\text{M}$ ], the red and green lines show oxygen flux [ $\text{pmol}/(\text{s}\cdot\text{mg tissue})$ ] of two replica. Mitochondrial respiration was performed in liver tissue homogenate at a final concentration of 1 mg/ml in MiRO5 respiration medium. After adding the homogenate into the O2k chambers, a substrate-uncoupler-inhibitor titration (SUIT) protocol was applied. **(C)** Coupling/pathway control diagram which illustrates the SUIT protocol used for analysis of mitochondrial respiration. LEAK respiration ( $L$ ) was measured in the presence of the NADH-linked substrates pyruvate ( $P$ ), glutamate ( $G$ ) and malate ( $M$ ): state  $N_L$ ; OXPHOS capacity ( $P$ ) was obtained in the presence of saturating ADP ( $D$ ) concentration: state  $N_P$  and after addition of succinate state  $NS_P$ ; NS- and succinate ( $S$ -) electron transfer system capacity (ETS,  $E$ ) was measured using stepwise uncoupler ( $U$ ) titration of CCCP: state  $NS_E$ ; S-ETS capacity was obtained after inhibition of Complex I by rotenone ( $Rot$ ): state  $S_E$ . Residual oxygen consumption (ROX) was obtained after inhibition of Complex III by antimycin A ( $Ama$ ). For abbreviations see Fig. 3.

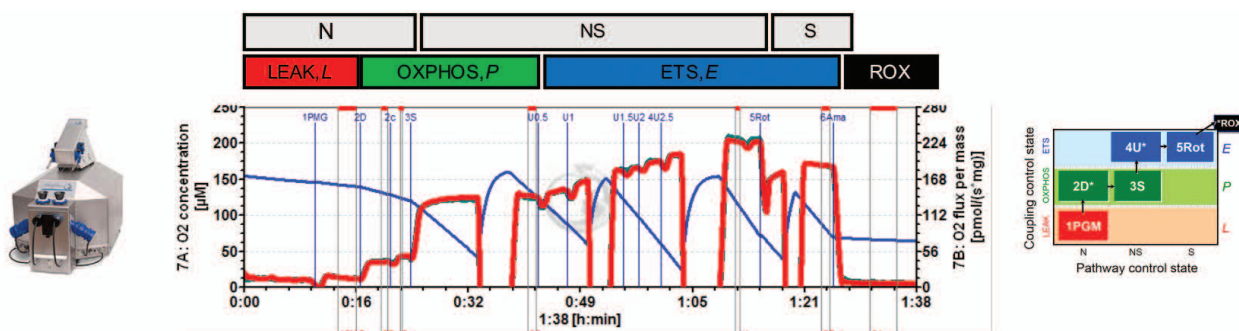

**Fig. S2** Effects of iron diet on strain specific activity of mitochondrial and cytosolic superoxide dismutase (SOD). Mitochondrial (A) and cytosolic (B) aconitase activity were assessed in liver tissues as described in the Experimental section. Graphs show box blots with min and max. FVB Controls (*black*, *n*=6), FVB High Iron diet (*grey*, *n*=6); C57BL/6N Controls (*black*, *n*=6), C57BL/6N High Iron diet (*grey*, *n*=6). One-Way ANOVA test was performed. BL6: C57BL/6N.

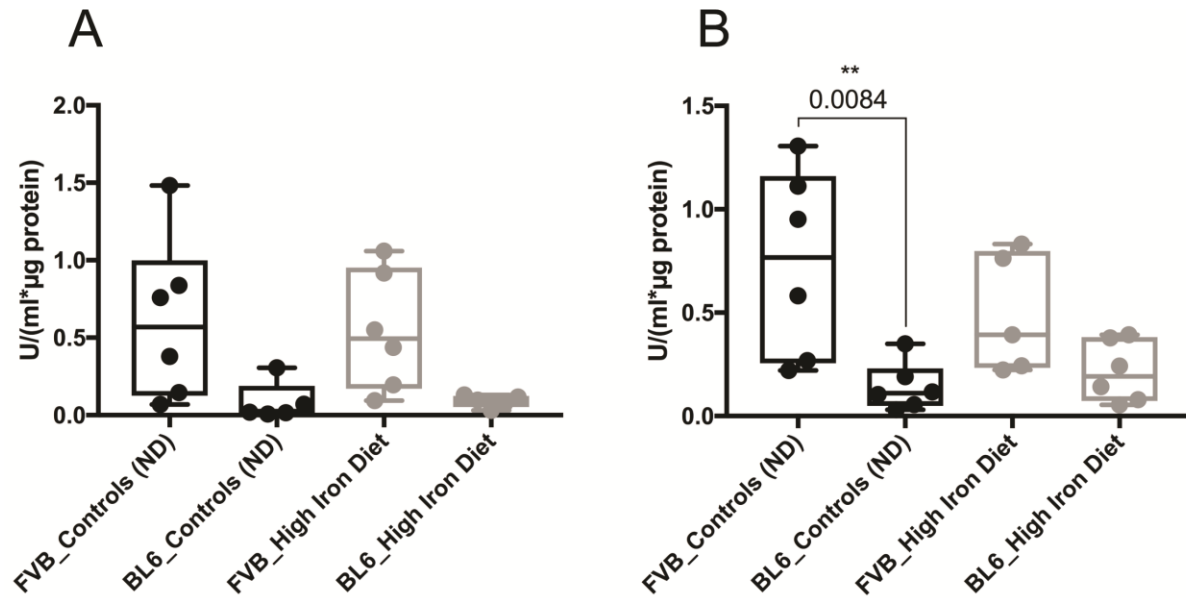

Supplement: c7mt00177k1.pdf [file c7mt00177k1.pdf]
